# Supplementary material for: Association of triglyceride-glucose index and lipid parameters with colorectal cancer in non-diabetic and non-obese subjects: a case-control study
Source: Research Square preprint supplement (doi:10.21203/rs.3.rs-7868211/v1), 2025-11-19
Supplement: Supplementary file 1 [file 8b84d8bb86eedcca86902696.xlsx]

## Sheet: Training set
Group	Gender	Age	height	Body weight	bmi	hypertension	diabetes	Cerebrovascular diseases	Cardiovascular diseases	Triglycerides	Fasting blood glucose	cst4	Total cholesterol	High density lipoprotein	tyg	tyg-bmi
0	0	70	1.6	39	15.2344	0	0	0	0	0.74	5.8	151.96	4.05	1.81	8.13777	123.974
0	1	71	1.7	61	21.1073	0	0	0	0	0.77	5	44.99	4.61	1.46	8.02909	169.472
0	0	59	1.58	53	21.2306	0	0	0	0	1.54	5.1	30.97	6.46	1.92	8.74204	185.599
0	1	60	1.6	48	18.75	0	0	0	0	1.18	5.7	48.25	4.48	1.12	8.587	161.006
0	1	76	1.75	68	22.2041	1	0	0	0	0.61	4.7	100.5	4.14	1.24	7.73428	171.733
0	1	74	1.68	64	22.6757	0	0	0	0	1.26	4.4	49.71	5.28	1.16	8.39373	190.334
0	1	67	1.66	62.5	22.6811	1	0	0	0	1.1	5.3	21.81	3.44	0.83	8.44403	191.52
0	0	66	1.55	52	21.6441	0	0	0	1	0.65	2.5	36.32	4.46	1.15	7.16653	155.113
0	0	41	1.6	62.5	24.4141	0	0	0	0	0.35	5.1	69.84	3.46	1.56	7.26044	177.257
0	1	48	1.65	60	22.0386	0	0	0	0	1.21	4.6	37.63	4.04	0.85	8.39769	185.073
0	1	67	1.66	62.5	22.6811	1	0	0	0	1.1	5.3	21.81	3.44	0.83	8.44403	191.52
0	0	76	1.66	53	19.2336	0	0	1	0	1.26	5.8	57.45	4.33	1.66	8.66999	166.755
0	0	61	1.6	48	18.75	0	0	0	0	0.55	5.6	48.16	4.69	2	7.80595	146.362
0	1	65	1.65	50	18.3655	1	0	0	0	1.82	5.1	45.47	4.14	0.77	8.90909	163.62
0	1	75	1.7	60	20.7612	1	0	1	0	0.42	5.5	45.71	3.94	1.27	7.51827	156.089
0	1	78	1.8	67	20.679	1	0	0	0	0.72	10.5	30.65	5.61	1.89	8.70389	179.988
0	0	71	1.62	54	20.5761	0	0	0	0	1.58	5.1	17.81	4.57	1.14	8.76768	180.405
0	1	58	1.75	70.5	23.0204	0	0	0	0	1.71	5.5	29.9	4.98	1.1	8.92226	205.394
0	1	62	1.7	67	23.1834	0	0	0	0	1.51	4.3	26.71	5.59	1.58	8.55174	198.258
0	1	61	1.73	67	22.3863	0	0	0	0	1.8	5.8	29.05	4.13	1.14	9.02666	202.074
0	0	58	1.67	56	20.0796	0	0	0	0	0.84	4.6	36.64	4.78	1.57	8.03272	161.294
0	0	71	1.54	50	21.0828	1	0	0	0	0.79	5.4	14.78	3.98	1.12	8.13169	171.439
0	0	57	1.63	62	23.3355	1	0	0	0	1.47	5.5	31.83	4.58	1.52	8.77103	204.676
0	0	58	1.6	56	21.875	0	0	0	0	0.51	5.5	40.2	4.41	1.86	7.71242	168.709
0	1	56	1.78	55	17.3589	1	0	0	0	0.83	5.1	55.73	4.67	1.62	8.12393	141.023
0	0	51	1.56	54	22.1893	0	0	0	0	0.89	5.6	12.9	4.51	1.57	8.28725	183.889
0	0	79	1.59	46	18.1955	1	0	0	0	1.2	4.5		5.43	1.5	8.36742	152.249
0	1	57	1.75	72	23.5102	0	0	0	0	0.91	5.2	31.19	4.16	1.14	8.23537	193.615
0	1	73	1.63	63	23.7118	1	0	0	0	1.54	5.9	24.4	4.51	1.06	8.88775	210.745
0	0	22	1.6	56	21.875	0	0	0	0	1.06	5.5	34.04	4.35	0.95	8.44403	184.713
0	1	70	1.7	55	19.0311	0	0	0	0	0.9	4.6	85.4	5.29	1.34	8.10171	154.185
0	1	60	1.76	70	22.5981	0	0	0	0	1.49	6.7	35.88	5.23	1.09	8.9819	202.974
0	1	70	1.55	46	19.1467	0	0	1	0	1.14	5.2	10.41	5.95	1.32	8.4607	161.995
0	0	51	1.55	53	22.0604	0	0	0	0	0.97	4.7	34.41	4.83	1.06	8.19812	180.853
0	1	47	1.7	62.5	21.6263	0	0	0	0	1.16	5.2	13.51	4.93	0.84	8.4781	183.35
0	1	70	1.7	60	20.7612	1	0	0	0	1.35	5.3	23.84	3.81	1.33	8.64883	179.56
0	1	71	1.7	64	22.1453	0	0	0	0	1.57	5.1	30.92	3.57	0.77	8.76133	194.023
0	0	60	1.5	44.5	19.7778	0	0	0	0	0.74	4.9	30.51	4.77	1.49	7.96915	157.612
0	0	54	1.53	50	21.3593	0	0	0	0	0.76	5.1	33.21	4.79	1.49	8.03582	171.64
0	0	61	1.57	55	22.3133	0	0	0	0	1.16	5.1	42.36	4.91	1.45	8.45868	188.741
0	1	60	1.74	63	20.8086	0	0	0	0	1.16	4.6	49.28	5.16	1.33	8.35549	173.866
0	1	53	1.58	50	20.0288	0	0	0	0	1.52	5	40.47	4.81	1.17	8.70917	174.435
0	1	60	1.65	60	22.0386	1	0	0	0	1.04	4.9	74.8	3.53	0.88	8.30947	183.129
0	0	53	1.59	49	19.3821	0	0	0	0	0.74	4.6	89.34	5.84	1.77	7.90597	153.235
0	1	60	1.62	62	23.6244	0	0	0	0	1.75	5.5	14.92	5.58	1.05	8.94538	211.33
0	0	70	1.55	56	23.3091	0	0	0	0	1.58	6.9	23.98	3.04	0.68	9.06996	211.412
0	0	39	1.6	48	18.75	0	0	0	0	1.44	6	26.48	7.53	1.55	8.83742	165.702
0	1	61	1.7	66	22.8374	0	0	0	0	1.38	5.2	150.98	4.67	1.39	8.65176	197.583
0	1	72	1.66	65	23.5883	0	0	0	0	1.49	5.3	47.26	4.43	1	8.7475	206.339
0	1	61	1.73	68	22.7204	0	0	0	0	1.26	5.2	11.6	5.36	1.16	8.56079	194.505
0	1	62	1.7	70	24.2215	0	0	0	0	1.34	5.6	40.79	5.16	1.3	8.69645	210.641
0	0	44	1.55	56	23.3091	0	0	0	0	0.59	5.1	36.03	3.87	1.12	7.78263	181.406
0	1	64	1.58	48	19.2277	0	0	0	0	0.54	4.8		3.9	1.49	7.63345	146.774
0	0	73	1.64	60	22.3081	0	0	0	0	1.09	5.3		6.41	1.96	8.4349	188.167
0	1	68	1.7	60	20.7612	0	0	0	0	0.43	4.7		3.04	1.37	7.38461	153.314
0	1	60	1.72	60	20.2812	0	0	0	0	0.92	4.6	8.6	5.03	1.24	8.12369	164.759
0	1	49	1.6	70	27.3438	0	0	0	0	1.5	4.6		5.21	1.07	8.61254	235.499
0	1	35	1.7	63	21.7993	0	0	0	0	0.72	4.2		5.01	1.17	7.7876	169.764
0	1	62	1.78	70	22.0932	0	0	0	0	0.86	5.1	83.37	4.07	1.13	8.15944	180.268
0	1	58	1.6	50	19.5312	0	0	0	0	0.88	5	42.94	4.53	1.44	8.16262	159.426
0	1	46	1.63	50	18.8189	0	0	0	0	1.07	4.8	75.35	4.91	1.88	8.31729	156.522
0	1	73	1.7	63	21.7993	0	0	0	0	0.66	5.5	131.6	5.46	1.25	7.97025	173.746
0	1	73	1.7	64	22.1453	0	0	0	0	1.01	5.4	80.72	5.49	1.32	8.37737	185.52
0	1	76	1.75	56	18.2857	0	0	0	0	1.03	5		4.1	1.07	8.32001	152.137
0	0	50	1.63	60	22.5827	0	0	0	0	1.06	5.1	90.05	4.22	1.59	8.36853	188.984
0	0	51	1.57	55	22.3133	0	0	0	0	0.96	5.2	45.42	3.9	1.3	8.28885	184.952
0	1	58	1.75	78	25.4694	0	0	0	0	0.79	5	66.82	6.29	1.36	8.05473	205.149
0	1	74	1.68	64	22.6757	0	0	0	0	1.26	4.4	49.71	5.28	1.16	8.39373	190.334
0	1	67	1.66	62.5	22.6811	1	0	0	0	1.1	5.3	21.81	3.44	0.83	8.44403	191.52
0	1	51	1.75	72.5	23.6735	0	0	0	0	1.58	4.8		5.2	1.21	8.70706	206.126
0	0	89	1.4	45.5	23.2143	0	0	0	0	1.72	5.1	29.4	5.57	1.07	8.85258	205.506
0	0	48	1.5	62	27.5556	0	0	0	0	0.63	5.3	50.22	5.31	1.71	7.88669	217.322
0	1	84	1.65	74	27.1809	0	0	1	0	1.52	4.9	256.01	3.4	0.85	8.68896	236.174
0	1	53	1.7	68	23.5294	1	0	0	0	0.93	5.2	17.73	4.05	1.04	8.25711	194.285
0	1	55	1.6	60	23.4375	0	0	0	0	0.89	9		4.04	1.38	8.76171	205.353
0	1	53	1.73	71	23.7228	0	0	0	0	0.76	4.7		4.58	1.16	7.95414	188.695
0	1	58	1.78	57	17.9902	0	0	0	0	1.22	5		5.15	1.68	8.48931	152.724
0	0	50	1.58	48	19.2277	0	0	0	0	1.8	5.9	49.17	5.72	1.11	9.04376	173.891
0	1	62	1.7	67	23.1834	0	0	0	0	1.51	4.3	26.71	5.59	1.58	8.55174	198.258
0	1	36	1.71	55	18.8092	0	0	0	0	0.76	5.5	36.41	3.81	1.62	8.11133	152.568
0	1	60	1.7	72.5	25.0865	1	0	0	0	1.52	5.3	34.66	4.04	0.78	8.76743	219.944
0	1	58	1.64	56	20.8209	1	0	0	0	0.59	5.2		6.28	1.29	7.80204	162.446
0	0	61	1.55	46	19.1467	1	0	0	1	1.18	4.5	10.34	4.03	0.93	8.35061	159.887
0	0	61	1.7	65	22.4913	0	0	0	0	0.78	6.1	39.04	5.71	1.33	8.24085	185.348
0	1	47	1.68	65	23.03	0	0	0	0	1.06	5.9	65.44	5.86	0.97	8.51424	196.083
0	1	40	1.65	54	19.8347	0	0	0	0	0.69	5.9	77.96	4.14	1.24	8.08491	160.362
1	1	56	1.68	62	21.9671	1	0	0	0	1.88	5.3		3.43	0.84	8.98	197.265
1	1	79	1.68	65	23.03	1	0	1	0	2	7		2.17	0.49	9.32008	214.642
1	1	48	1.68	65	23.03	1	0	0	0	1.54	4.8		3.51	0.67	8.68142	199.933
1	1	61	1.7	63	21.7993	1	0	1	0	1.48	5.4		4.54	1.37	8.75946	190.95
1	1	60	1.7	64	22.1453	1	0	1	0	1.56	5.8		4.1	1.51	8.88356	196.729
1	0	38	1.56	58	23.833	0	0	0	0	1.04	6.4		3.26	0.85	8.57654	204.405
1	1	79	1.7	65	22.4913	1	0	0	0	1.36	5.3			1.11	8.65621	194.69
1	1	79	1.72	65	21.9713	1	0	0	0	1.04	5.3	967.54	3.31	0.77	8.38795	184.294
1	0	59	1.6	50	19.5312	0	0	0	0	2.37	3.7		6.3	0.56	8.85224	172.895
1	1	57	1.72	70	23.6614	0	0	0	1	1.4	5.8		3.6	1.23	8.77535	207.637
1	1	57	1.72	70	23.6614	0	0	0	1	1.12	5.3		3.73	1.28	8.46205	200.224
1	0	79	1.55	55	22.8928	1	0	0	0	0.8	6.2	376.27	2.69	0.95	8.28242	189.608
1	1	57	1.72	70	23.6614	0	0	0	1	1.21	5.9		3.51	1.28	8.64659	204.591
1	0	67	1.55	42.5	17.6899	0	0	0	0	2	5.8		4.53	1.39	9.13202	161.545
1	0	66	1.6	55	21.4844	0	0	0	0	1.02	5.3		4.3	1.3	8.36853	179.793
1	0	67	1.55	45	18.7305	0	0	0	0	1.45	6		5.48	2.1	8.84434	165.659
1	0	67	1.58	41.5	16.6239	0	0	0	0	0.88	5.9		4.47	1.58	8.32814	138.446
1	0	61	1.65	55	20.202	0	0	0	0	1.52	5.1		4.86	1.67	8.72897	176.343
1	0	69	1.64	70	26.0262	0	0	0	1	3.38	5.3	36.46	5.67	1.39	9.5666	248.982
1	0	67	1.6	51.5	20.1172	0	0	0	0	1.01	5.7		4.47	1.68	8.43143	169.617
1	1	76	1.66	60	21.7738	1	0	0	0	0.94	5.5			1.25	8.32389	181.243
1	1	58	1.73	60	20.0474	0	0	0	0	1.2	6.1		4.68	0.95	8.67163	173.844
1	1	67	1.58	55	22.0317	0	0	0	0	2.71	4.5		5.87	0.86	9.18204	202.296
1	0	71	1.58	55	22.0317	0	0	0	0	2.32	4.9		5.26	1.21	9.11182	200.749
1	0	57	1.56	44	18.0802	0	0	0	0	1.23	5.5		3.02	0.66	8.59278	155.359
1	0	88	1.6	60	23.4375	1	0	0	1	1.1	8.3		2.09	0.57	8.89258	208.42
1	1	67	1.64	60	22.3081	0	0	0	0	1.91	5.4		5.69	0.9	9.01452	201.097
1	1	76	1.66	60	21.7738	1	0	0	0	0.85	5.6			1.2	8.24127	179.444
1	1	76	1.66	60	21.7738	1	0	0	0	0.85	5.6			1.2	8.24127	179.444
1	1	69	1.65	48	17.6309	0	0	0	0	1.55	6.2		3.07	0.84	8.94382	157.687
1	1	67	1.64	57	21.1927	0	0	0	0	1.58	4.5		4.91	0.89	8.64252	183.159
1	1	76	1.62	55	20.9572	0	0	0	0	0.6	4.8	118.32	3.94	0.98	7.73881	162.184
1	1	76	1.69	60	21.0077	1	0	0	0	0.72	6.1		3.57	1.48	8.1608	171.439
1	1	68	1.63	50	18.8189	0	0	0	0	0.72	8.1		3.08	1.29	8.44438	158.914
1	1	63	1.62	58	22.1003	0	0	0	0	1.8	4.9		5.9	1.15	8.85804	195.765
1	1	84	1.7	50	17.301	0	0	1	1	0.81	5.8		2.25	1.27	8.22815	142.356
1	1	54	1.68	64	22.6757	0	0	0	0	2.32	6.6	93.73		1.17	9.40965	213.371
1	1	58	1.69	56	19.6072	0	0	0	0	2.33	6.7		4.55	1.17	9.42899	184.876
1	1	83	1.7	60	20.7612	1	0	0	0	0.77	5.4		4.78	1.55	8.10605	168.292

## Sheet: Validation set
Group	Gender	Age	height	Body weight	bmi	hypertension	diabetes	Cerebrovascular diseases	Cardiovascular diseases	Triglycerides	Fasting blood glucose	cst4	Total cholesterol	High density lipoprotein	tyg	tyg-bmi
0	0	52	1.58	48	19.2277	0	0	0	0	0.89	4.8	57.42	5.28	1.54	8.1331	156.381
0	1	72	1.65	64	23.5078	1	0	0	0	0.84	5.1	80.02	3.64	0.8	8.1359	191.257
0	1	55	1.78	75	23.6713	0	0	0	0	0.7	4.8	18.56	4.38	1.38	7.89296	186.836
0	1	67	1.7	68	23.5294	1	0	0	0	1.02	7.1	65.79	5.74	1.4	8.66092	203.786
0	1	55	1.82	75	22.6422	1	0	0	0	1.6	6	137.52	4.08	1.18	8.94278	202.484
0	1	73	1.65	55	20.202	0	0	1	0	0.51	5.4	75.66	4.66	1.27	7.69407	155.436
0	1	32	1.75	72	23.5102	0	0	0	0	1.08	5.5	33.5	5.29	1.07	8.46273	198.96
0	0	52	1.62	53.5	20.3856	0	0	0	0	0.35	5.5	36.19	5.02	1.35	7.33594	149.548
0	0	53	1.6	60	23.4375	0	0	0	0	1.12	4.6		5.39	1.34	8.3204	195.009
0	1	58	1.75	70.5	23.0204	0	0	0	0	1.71	5.5	29.9	4.98	1.1	8.92226	205.394
0	1	38	1.66	47	17.0562	0	0	0	0	1.34	5.1	21.19	4.74	1.12	8.60293	146.733
0	1	48	1.6	55	21.4844	0	0	0	0	0.82	5.5	41.89	5.36	1.1	8.18731	175.899
0	0	48	1.63	55	20.7008	0	0	0	0	1.03	4.9		4.44	1.4	8.29981	171.813
0	1	73	1.63	63	23.7118	1	0	0	0	0.54	5.9	24.4	4.51	1.06	7.83978	185.896
0	1	55	1.82	75	22.6422	1	0	0	0	1.6	6	137.52	4.08	1.18	8.94278	202.484
0	0	55	1.62	55	20.9572	0	0	0	0	1.62	5.5	31.58	5.17	1.27	8.86819	185.852
0	1	52	1.7	72	24.9135	0	0	0	0	1.01	5.2	4.32	3.71	1.19	8.33963	207.769
0	1	61	1.73	68	22.7204	0	0	0	0	1.12	5.6	57.34	4.66	1.18	8.51711	193.513
0	1	67	1.6	47	18.3594	0	0	0	0	1.02	5.7	55.44	5.88	1.77	8.44129	154.977
0	0	52	1.6	56	21.875	0	0	0	0	0.87	5	39.72	4.14	1.24	8.15119	178.307
0	1	60	1.62	53	20.1951	0	0	0	0	0.65	5	23.41	6.59	1.39	7.85967	158.727
0	1	59	1.57	58	23.5304	1	0	0	0	0.92	5.7	40.87	4.77	1.07	8.3381	196.199
0	1	64	1.58	48	19.2277	0	0	0	0	0.54	4.8		3.9	1.49	7.63345	146.774
0	1	60	1.72	60	20.2812	0	0	0	0	0.92	4.6	8.6	5.03	1.24	8.12369	164.759
0	0	69	1.55	53	22.0604	0	0	0	0	0.89	5.6	44.68	5.35	1.38	8.28725	182.82
0	1	63	1.62	51	19.433	1	0	0	0	0.93	5.4		6.63	2.17	8.29485	161.194
0	1	58	1.52	55	23.8054	0	0	0	0	0.82	5.1	36.1	5.23	1	8.11181	193.105
0	1	60	1.55	44	18.3143	0	0	0	0	1.09	5.8	52.42	6.52	1.73	8.52505	156.13
0	1	76	1.75	68	22.2041	1	0	0	0	0.61	4.2	100.5	4.14	1.24	7.62181	169.235
0	1	57	1.7	60	20.7612	0	0	0	0	0.79	5.5	51.74	4.76	1.45	8.15004	169.205
0	1	60	1.79	72	22.4712	0	0	0	0	1.01	5.4	60.15	4.23	0.77	8.37737	188.25
0	1	55	1.82	75	22.6422	1	0	0	0	1.6	6	137.52	4.08	1.18	8.94278	202.484
0	1	50	1.72	65	21.9713	0	0	0	0	1.19	5	48.26	4.38	0.83	8.46441	185.974
0	1	57	1.68	63	22.3214	0	0	0	0	1.41	6.2	63.47	6.27	2.22	8.84916	197.526
0	0	56	1.55	51	21.2279	1	0	0	0	1	4.8		4.78	1.38	8.24963	175.122
0	1	65	1.65	56	20.5693	1	0	0	0	0.82	5.1	45.47	4.14	0.77	8.11181	166.854
0	0	63	1.6	52	20.3125	0	0	1	0	0.88	5.2		5.55	1.49	8.20184	166.6
1	1	79	1.7	69	23.8754	1	0	0	0	1.16	5.1		4.15	1.52	8.45868	201.955
1	1	63	1.65	59	21.6713	0	0	0	0	2.27	5.5		6.18	1.14	9.20555	199.496
1	0	75	1.62	53	20.1951	0	0	0	0	1.26	5		4.65	1.27	8.52157	172.094
1	0	59	1.65	61	22.4059	0	0	0	0	1.8	5.3	80.83	4.44	1.07	8.93651	200.23
1	1	54	1.68	64	22.6757	0	0	0	0	2.17	7.3	66.89	2.16	1.33	9.44362	214.141
1	1	76	1.6	49	19.1406	0	0	0	0	0.68	4.7		3.43	1.2	7.84292	150.118
1	1	63	1.62	53	20.1951	0	0	0	0	1.77	4.9		2.82	1.43	8.84123	178.55
1	1	74	1.79	61	19.0381	0	0	0	1	0.65	6.6		0.65	1.55	8.1373	154.919
1	0	70	1.56	55	22.6003	0	0	0	0	1.37	4.6		4.1	1.01	8.52188	192.597
1	1	54	1.68	64	22.6757	0	0	0	0	2	6.6	62.04	3.29	1.1	9.26123	210.005
1	1	85	1.71	48	16.4153	1	0	0	0	1.57	5.3		4.11	1.58	8.7998	144.451
1	1	66	1.7	53	18.3391	1	0	0	0	0.65	4.5	126.11	3.98	1.48	7.75431	142.207
1	1	76	1.7	54	18.6851	0	0	1	1	0.89	5.2	61.61	2.65	0.85	8.21314	153.464
1	1	76	1.66	60	21.7738	1	0	0	0	1.87	5.4		1.98	1.27	8.99336	195.82
1	0	70	1.6	60	23.4375	0	0	0	0	1.53	4.7		3.83	0.9	8.65385	202.825
1	1	54	1.68	64	22.6757	0	0	0	0	2.24	5.7	59.91	4.1	1.45	9.22796	209.251
1	0	73	1.55	55	22.8928	1	0	1	0	1.48	5.7	450.01	5.96	1.26	8.81353	201.766
1	1	96	1.62	50	19.052	1	0	1	0	1.26	7.2		1.27	0.72	8.88621	169.3
